# Supplementary material for: Alteration of primary cilia and intraflagellar transport 20 (IFT20) expression in oral squamous cell carcinoma (OSCC) cell lines
Source: PeerJ. 2025 Feb 24;13:e18931. doi: 10.7717/peerj.18931 (PMC11867036; doi:10.7717/peerj.18931)
Supplement: Supplemental Information 1 [file peerj-13-18931-s001.xls]

## Sheet: Sheet1
ITEM TO CHECK	IMPORTANCE	CHECKLIST	LINE NUMBER IN MANUSCRIPT
EXPERIMENTAL DESIGN
Definition of experimental and control groups	E	YES	104-110
Number within each group	E	YES	191-192
Assay carried out by core lab or investigator's lab?	D	YES	Investigator's lab
Acknowledgement of authors' contributions	D	YES	Author information
SAMPLE
Description	E	YES	104-110
Volume/mass of sample processed	D	N/A	N/A
Microdissection or macrodissection	E	N/A	N/A
Processing procedure	E	YES	119-125
If frozen - how and how quickly?	E	N/A	N/A
If fixed - with what, how quickly?	E	N/A	N/A
Sample storage conditions and duration (especially for FFPE samples)	E	YES	105-114
NUCLEIC ACID EXTRACTION
Procedure and/or instrumentation	E	YES	167-169
Name of kit and details of any modifications	E	YES	167-168
Source of additional reagents used	D	N/A	N/A
Details of DNase or RNAse treatment	E	YES	168-169
Contamination assessment (DNA or RNA)	E	N/A	N/A
Nucleic acid quantification	E	YES	169-170
Instrument and method	E	YES	169-170
Purity (A260/A280)	D	YES	170-171
Yield	D	N/A	N/A
RNA integrity method/instrument	E	N/A	N/A
RIN/RQI or Cq of 3' and 5' transcripts	E	N/A	N/A
Electrophoresis traces	D	N/A	N/A
Inhibition testing (Cq dilutions, spike or other)	E	N/A	N/A
REVERSE TRANSCRIPTION
Complete reaction conditions	E	N/A	N/A
Amount of RNA and reaction volume	E	YES	171
Priming oligonucleotide (if using GSP) and concentration	E	N/A	N/A
Reverse transcriptase and concentration	E	N/A	N/A
Temperature and time	E	YES	173-174
Manufacturer of reagents and catalogue numbers	D	YES	172
Cqs with and without RT	D*	N/A	N/A
Storage conditions of cDNA	D	N/A	N/A
qPCR TARGET INFORMATION
If multiplex, efficiency and LOD of each assay.	E	N/A	N/A
Sequence accession number	E	N/A	N/A
Location of amplicon	D	N/A	N/A
Amplicon length	E	N/A	N/A
In silico specificity screen (BLAST, etc)	E	N/A	N/A
Pseudogenes, retropseudogenes or other homologs?	D	N/A	N/A
Sequence alignment	D	N/A	N/A
Secondary structure analysis of amplicon	D	N/A	N/A
Location of each primer by exon or intron (if applicable)	E	N/A	N/A
What splice variants are targeted?	E	N/A	N/A
qPCR OLIGONUCLEOTIDES
Primer sequences	E	N/A	N/A
RTPrimerDB Identification Number	D	YES	176-177
Probe sequences	D**	N/A	N/A
Location and identity of any modifications	E	N/A	N/A
Manufacturer of oligonucleotides	D	YES	177
Purification method	D	N/A	N/A
qPCR PROTOCOL
Complete reaction conditions	E	N/A	N/A
Reaction volume and amount of cDNA/DNA	E	N/A	N/A
Primer, (probe), Mg++ and dNTP concentrations	E	N/A	N/A
Polymerase identity and concentration	E	N/A	N/A
Buffer/kit identity and manufacturer	E	YES	175
Exact chemical constitution of the buffer	D	N/A	N/A
Additives (SYBR Green I, DMSO, etc.)	E	N/A	N/A
Manufacturer of plates/tubes and catalog number	D	N/A	N/A
Complete thermocycling parameters	E	YES	180-182
Reaction setup (manual/robotic)	D	MANUAL
Manufacturer of qPCR instrument	E	YES	179-180
qPCR VALIDATION
Evidence of optimisation (from gradients)	D	N/A	N/A
Specificity (gel, sequence, melt, or digest)	E	N/A	N/A
For SYBR Green I, Cq of the NTC	E	N/A	N/A
Standard curves with slope and y-intercept	E	N/A	N/A
PCR efficiency calculated from slope	E	N/A	N/A
Confidence interval for PCR efficiency or standard error	D	N/A	N/A
r2 of standard curve	E	N/A	N/A
Linear dynamic range	E	N/A	N/A
Cq variation at lower limit	E	N/A	N/A
Confidence intervals throughout range	D	N/A	N/A
Evidence for limit of detection	E	N/A	N/A
If multiplex, efficiency and LOD of each assay.	E	N/A	N/A
DATA ANALYSIS
qPCR analysis program (source, version)	E	YES	182-183
Cq method determination	E	N/A	N/A
Outlier identification and disposition	E	N/A	N/A
Results of NTCs	E	N/A	N/A
Justification of number and choice of reference genes	E	N/A	N/A
Description of normalisation method	E	YES	184
Number and concordance of biological replicates	D	YES	191-192
Number and stage (RT or qPCR) of technical replicates	E	YES	178
Repeatability (intra-assay variation)	E	N/A	N/A
Reproducibility (inter-assay variation, %CV)	D	N/A	N/A
Power analysis	D	N/A	N/A
Statistical methods for result significance	E	N/A	N/A
Software (source, version)	E	N/A	N/A
Cq or raw data submission using RDML	D	N/A	N/A
Table 1. MIQE checklist for authors, reviewers and editors. All essential information (E) must be submitted with the manuscript. Desirable
information (D) should be submitted if available. If using primers obtained from RTPrimerDB, information on qPCR target, oligonucleotides,
protocols and validation is available from that source.
*: Assessing the absence of DNA using a no RT assay is essential when first extracting RNA. Once the sample has been validated as
RDNA-free, inclusion of a no-RT control is desirable, but no longer essential.
**: Disclosure of the probe sequence is highly desirable and strongly encouraged. However, since not all commercial pre-designed assay
vendors provide this information, it cannot be an essential requirement. Use of such assays is advised against.
