# Supplementary material for: Alteration of primary cilia and intraflagellar transport 20 (IFT20) expression in oral squamous cell carcinoma (OSCC) cell lines
Source: PeerJ. 2025 Feb 24;13:e18931. doi: 10.7717/peerj.18931 (PMC11867036; doi:10.7717/peerj.18931)
Supplement: Supplemental Information 2 — The raw data includes unprocessed measurements or analysis collected throughout the study, reflecting the initial results before any statistical analysis. Data is grouped by relevant experimental parameters as appropriate. [file peerj-13-18931-s002.xlsx]

## Sheet: Figure 1 & Figure 2 (raw) 
Title:	Cell count for occurrence of primary cilia. A total of 200 cells were counted for each biological repeat (Total 3 biological repeats for each cell lines)
		Low serum media (2% serum concentration)																High serum media (20% serum concentration)
		24 h				48 h				72 h				5 d				24 h				48 h				72 h				5 d
		Nucleus	Nucleus with primary cilia	%		Nucleus	Nucleus with primary cilia	%		Nucleus	Nucleus with primary cilia	%		Nucleus	Nucleus with primary cilia	%		Nucleus	Nucleus with primary cilia	%		Nucleus	Nucleus with primary cilia	%		Nucleus	Nucleus with primary cilia	%		Nucleus	Nucleus with primary cilia	%
OKF6-TERT2 (Repeat 1)		25	0			36	1			41	3			66	4			17	0			20	0			46	1			61	1
		32	2			32	2			9	0			7	1			22	1			19	0			20	2			61	1
		24	1			33	1			37	2			78	3			19	0			22	0			35	0			13	0
		35	1			36	1			38	3			49	4			15	1			23	0			32	1			65	1
		29	1			27	2			40	3							15	0			34	1			35	2
		35	1			36	2			35	4							16	0			18	1			32	1
		20	1															20	0			29	2
																		15	0			21	0
																		20	0			14	0
																		16	0
																		25	0
	Total cells:	200	7	3.5		200	9	4.5		200	15	7.5		200	12	6		200	2	1		200	4	2		200	7	3.5		200	3	1.5
OKF6-TERT2 (Repeat 2)		30	1			25	2			33	1			60	6			18	0			15	2			22	1			20	1
		15	0			26	1			32	1			72	3			18	0			24	1			19	1			63	1
		23	0			28	1			28	2			68	5			20	0			19	1			20	0			59	1
		29	1			30	1			37	3							16	0			27	0			25	1			58	1
		33	2			28	1			27	4							13	1			25	1			22	1
		20	2			31	1			43	2							13	0			21	1			25	0
		29	1			32	2											15	0			28	0			6	0
		21	1															15	1			32	0			19	0
																		16	0			9	0			21	2
																		15	0							21	1
																		15	0
																		10	0
																		16	1
	Total cells:	200	8	4		200	9	4.5		200	13	6.5		200	14	7		200	3	1.5		200	6	3		200	7	3.5		200	4	2
OKF6-TERT2 (Repeat 3)		25	3			27	0			26	2			81	2			19	0			20	0			24	0			75	1
		23	1			32	2			36	2			76	6			14	1			24	1			22	0			82	2
		33	2			26	3			29	4			43	4			14	1			23	0			24	0			43	2
		21	2			26	1			7	0							23	0			18	2			19	0
		29	0			31	1			34	2							18	0			26	0			17	3
		34	1			33	2			32	2							17	0			19	0			24	1
		29	0			7	2			36	1							19	1			26	0			24	1
		6	0			18	0											26	0			27	1			23	1
																		20	0			17	1			23	0
																		4	0
																		26	0
	Total cells:	200	9	4.5		200	11	5.5		200	13	6.5		200	12	6		200	3	1.5		200	5	2.5		200	6	3		200	5	2.5
HSC-2 (Repeat 1)		28	1			51	2			30	5			45	2			19	1			26	4			41	6			64	3
		22	0			41	3			48	9			46	2			27	1			32	1			24	3			46	4
		30	1			38	2			38	3			41	1			19	2			32	2			31	5			75	9
		31	2			22	2			30	10			49	5			30	2			32	4			38	8			15	1
		18	1			24	6			37	7			19	2			23	0			24	1			37	6
		27	3			24	4			17	2							25	0			33	3			29	5
		30	1															19	3			21	3
		14	1															24	2
																		14	2
	Total cells:	200	10	5		200	19	9.5		200	36	18		200	12	6		200	13	6.5		200	18	9		200	33	16.5		200	17	8.5
HSC-2 (Repeat 2)		23	1			31	3			32	10			43	4			17	1			41	6			37	8			74	7
		22	2			34	5			35	6			35	6			17	1			48	2			37	8			75	9
		10	2			29	4			38	7			42	7			20	2			33	3			61	7			51	6
		19	2			31	4			37	8			40	4			23	1			38	3			5	1
		26	2			48	3			25	4			40	2			11	1			40	4			33	10
		15	2			27	5			17	6							23	3							27	9
		29	1							16	3							25	3
		23	2															9	1
		33	2															31	1
																		24	1
	Total cells:	200	16	8		200	24	12		200	44	22		200	23	11.5		200	15	7.5		200	18	9		200	43	21.5		200	22	11
HSC-2 (Repeat 3)		12	1			38	9			38	12			47	9			27	0			41	3			37	8			49	2
		27	1			44	6			48	15			48	9			23	1			48	3			32	6			69	17
		10	2			47	6			36	8			70	8			32	0			40	2			38	6			82	10
		25	2			42	1			40	9			35	5			25	0			35	3			32	8
		19	3			29	3			38	10							20	0			36	5			47	5
		37	2															24	3							14	5
		33	2															13	3
		13	2															31	3
		24	0															5	1
	Total cells:	200	15	7.5		200	25	12.5		200	54	27		200	31	15.5		200	11	5.5		200	16	8		200	38	19		200	29	14.5
HSC-3 (Repeat 1)		78	1			44	2			75	7			98	5			43	0			44	3			83	6			99	6
		110	1			43	2			72	6			102	9			37	0			48	1			62	1			101	6
		12	0			43	2			53	12							40	0			41	3			55	5
						40	3											34	0			60	0
						30	3											46	0			7	1
	Total cells:	200	2	1		200	12	6		200	25	12.5		200	14	7		200	0	0		200	8	4		200	12	6		200	12	6
HSC-3 (Repeat 2)		19	0			60	2			44	13			95	9			50	0			38	2			53	1			111	4
		78	1			57	2			2	0			105	9			51	0			42	1			61	3			89	9
		103	4			40	1			51	1							31	1			52	2			62	6
						43	3			56	5							68	0			60	0			24	2
										47	4											8	0
	Total cells:	200	5	2.5		200	8	4		200	23	11.5		200	18	9		200	1	0.5		200	5	2.5		200	12	6		200	13	6.5
HSC-3 (Repeat 3)		57	1			55	3			77	9			135	12			46	0			25	0			58	2			116	8
		39	1			53	2			63	7			65	7			50	2			81	6			65	4			84	3
		60	0			64	4			60	9							53	1			94	2			66	6
		44	0			28	3											51	0							11	0
	Total cells:	200	2	1		200	12	6		200	25	12.5		200	19	9.5		200	3	1.5		200	8	4		200	12	6		200	11	5.5

## Sheet: Figure 1 & Figure 2 (%)
Title:	occurrence of primary cilia (%) in 3 biological repeats
		Low serum media (2% serum concentration)				High serum media (20% serum concentration)
	Groups	24 h	48 h	72 h	5 d	24 h	48 h	72 h	5 d
	OKF6-TERT2	4.5	4.5	7.5	6	1	2	3.5	1.5
	OKF6-TERT2	4	4.5	6.5	7	1.5	3	3.5	2
	OKF6-TERT2	3.5	5.5	6.5	6	1.5	2.5	3	2.5
	HSC-2	5	9.5	18	6	6.5	9	16.5	8.5
	HSC-2	8	12	22	11.5	7.5	9	21.5	11
	HSC-2	7.5	12.5	27	15.5	5.5	8	19	14.5
	HSC-3	1	6	12.5	7	0	4	6	6
	HSC-3	2.5	4	11.5	9	0.5	2.5	6	5
	HSC-3	1	6	12.5	9.5	1.5	4	6	5.5

## Sheet: Figure 3 & Figure 4
Title:	Length of primary cilia (μm) in 3 biological repeats
		Low serum media (2% serum concentration)				High serum media (20% serum concentration)
	Groups	24 h	48 h	72 h	5 d	24 h	48 h	72 h	5 d
	OKF6-TERT2	1.52	1.73	1.02	2.44	2.87	2.46	1.67	2.31
	OKF6-TERT2	2.5	1.73	1.97	2.4	2.74	2.45	1.61	3.27
	OKF6-TERT2	1.93	1.43	3.79	1.96	2.15	1.81	2.34	1.32
	OKF6-TERT2	2.28	2.7	1.94	1.45	2.03	1.73	1.73	1.75
	OKF6-TERT2	2.08	2.75	1.98	2.53	2.96	2.96	2	1.21
	OKF6-TERT2	1.13	2.02	2.13	1.37	1.81	2.15	1.88	1.94
	OKF6-TERT2	1.44	1.32	2.27	1.63	1.6	1.6	2.82	0.92
	OKF6-TERT2	2.33	2.3	2.73	1.22	2.72	3.53	1.92	2.46
	OKF6-TERT2	1.37	3.09	1.85	3.55		2.31	1.16	2.78
	OKF6-TERT2	1.51	1.32	2.88	1.6		1.32	1.63	1.97
	OKF6-TERT2	1.52	1.52	1.05	1.6		2.05	1.95	1.61
	OKF6-TERT2	1.83	1.91	1.79	1.03		2.05	2.27	1.2
	OKF6-TERT2	1.25	1.16	1.2	1.67		2.4	1.92
	OKF6-TERT2	2.53	0.91	2.29	2.28		3.02	1.87
	OKF6-TERT2	1.03	2.24	1.62	4.29		2.96	1.44
	OKF6-TERT2	1.77	1.45	1.79	4.07			1.36
	OKF6-TERT2	1.13	1.03	1.83	2.55			1.03
	OKF6-TERT2	1.81	2.04	2	1.61			1.81
	OKF6-TERT2	1.73	2.29	2.24	1.61			2.33
	OKF6-TERT2	2.64	1.8	3.04	1.65			1.93
	OKF6-TERT2	2.05	1.37	1.46	1.96
	OKF6-TERT2	1.81	1.87	1.52	1.16
	OKF6-TERT2	2.33	1.77	0.97	2.61
	OKF6-TERT2	1.87	1.16	1.71	2.61
	OKF6-TERT2		0.9	2.7	1.53
	OKF6-TERT2		1.29	1.69	1.86
	OKF6-TERT2		1.05	1.62	2.19
	OKF6-TERT2		1.43	1.55	2.88
	OKF6-TERT2		3.15	2.38	1.77
	OKF6-TERT2			2.14	1.75
	OKF6-TERT2			1.36	2.4
	OKF6-TERT2			2.02	2.09
	OKF6-TERT2			3.35	2.6
	OKF6-TERT2			2.74	1.49
	OKF6-TERT2			2.03	2.12
	OKF6-TERT2			2.23	1.8
	OKF6-TERT2			2.03	2.52
	OKF6-TERT2			2.8	1.89
	OKF6-TERT2			2.64
	OKF6-TERT2			1.83
	OKF6-TERT2			2.27
	HSC-2	1.93	3.78	3.85	2.26	4.44	2.29	3.31	3.61
	HSC-2	1.16	2.24	3.94	2.02	2.21	4.34	2.83	2.64
	HSC-2	1.47	3.66	4.28	3.46	2.45	3.39	2.82	2.04
	HSC-2	3.9	1.91	3.68	2.97	4.21	1.96	3.56	2.47
	HSC-2	1.37	3	1.29	3.06	3.6	4.4	1.8	2.1
	HSC-2	1.41	3.33	3.29	2.17	2.55	4.84	1.55	3.47
	HSC-2	2.35	2.89	3.04	3.02	4.15	4.44	3.51	2.16
	HSC-2	2.76	3.47	3.01	1.33	2.71	3.99	3.94	3.72
	HSC-2	4.14	4.06	3	3.83	4.04	4.67	3.59	3.43
	HSC-2	2.55	3.85	3.6	3.92	2.13	3.32	3.58	3.37
	HSC-2	3.13	2.77	3.26	2.86	2.81	4.98	2.55	3.29
	HSC-2	1.51	2.88	2.78	1.55	1.49	3.09	3.96	3.12
	HSC-2	0.79	3.23	3.46	2.6	4.19	3.18	1.97	3.9
	HSC-2	1.27	3.56	3.6	4.28	1.49	3.2	1.03	3.07
	HSC-2	6.55	2.42	3.47	2.62	3.44	2.83	3.53	4.71
	HSC-2	2.64	3.52	3.2	1.97	1.45	1.95	5.5	2.71
	HSC-2	2.13	4.45	3.5	2.69	4.04	2.14	3.84	2.53
	HSC-2	2.37	3.12	3.65	1.74	1.07	3.88	1.34	1.51
	HSC-2	2.29	3.7	2.71	2.86	3.19	2.89	3.4	2.46
	HSC-2	2.31	3.27	2.74	2.53	4.18	3.78	2.28	3.39
	HSC-2	3.64	1.81	3.87	2.85	4	3.1	2.82	4.96
	HSC-2	2.45	1.53	3.62	3.11	1.62	2.76	1.58	2.56
	HSC-2	1.91	2.85	2.53	3.03	1.51	2.54	2.55	2.94
	HSC-2	4.31	2.23	1.98	2.28	3.27	2.88	2.58	1.52
	HSC-2	1.38	2.77	4.09	3.65	2.88	3.18	2.14	3.69
	HSC-2	3.22	1.7	4.81	2.16	3.29	3.66	2.21	2.75
	HSC-2	5.1	3.04	3.16	1.21	3.08	3.04	2.16	1.9
	HSC-2	1.89	2.93	1.77	3.89	2.52	3.59	2	3.9
	HSC-2	4.15	4.08	1.94	2.64	2.88	1.09	3.9	3.14
	HSC-2	3.04	4.86	3.47	2.83	2.33	3.57	4.88	1.09
	HSC-2	3.39	1.33	1.52	4.8	2.55	2.49	5.65	2.49
	HSC-2	1.97	5.17	4.55	1.79	2.56	2.08	2.58	1.6
	HSC-2	3.22	5.09	2.64	3.86	3.57	1.97	1.77	1.06
	HSC-2	2.64	3.64	4.01	1.91	0.85	2.31	3.45	2.27
	HSC-2	1.8	3.92	2.83	3.04	1.88	2.79	2.71	3.9
	HSC-2	2.46	3.68	3.47	2.52	3.86	2.25	3.28	4.97
	HSC-2	2.73	4.2	3.06	2.28	2.15	3.16	2.76	2.97
	HSC-2	3.8	3.44	2.7	3.67	2.78	4.47	3.35	3.08
	HSC-2	1.9	2.73	2.9	2.08	1.79	4.6	3.85	2.83
	HSC-2	1.57	3.11	2.64	0.85	2.17	3.21	2.56	4.49
	HSC-2	3.34	1.87	3.01	2.55		4.21	2.08	2.53
	HSC-2		4.15	2.35	1.32		4.06	1.46	3.35
	HSC-2		4.17	3.09	2.74		2.75	1.92	3.02
	HSC-2		2.99	2.15	2.02		4.05	2.52	1.88
	HSC-2		3.47	2.77	3.02		3.85	2	1.9
	HSC-2		2.96	1.59	2.96		4.8	2.71	2.58
	HSC-2		3.15	1.05	5.13		1.27	3.28	2.38
	HSC-2		2.69	4.56	3.36		3.67	1.96	1.95
	HSC-2		3.34	3.15	2.96		3.4	1.96	2.98
	HSC-2		3.63	3.08	3.48		3.61	2.49	1.76
	HSC-2		1.98	2.46	2.82		3.19	2.85	1.41
	HSC-2		3.79	2.88	2.7		1.33	2.63	1.93
	HSC-2		2.17	4.29	3.3			2.59	1.27
	HSC-2		3.18	2.98	3.2			2.03	3.63
	HSC-2		3.18	3.39	2.83			2.79	3.69
	HSC-2		3.54	4.37	4.64			2.91	2.67
	HSC-2		3.25	4.54	2.84			4.47	2.36
	HSC-2		2.59	3.13	4.72			1.16	1.52
	HSC-2		3.14	3.37	2.63			2.69	2
	HSC-2		3.26	4.87	4.2			1.86	1.66
	HSC-2		4.74	3.56	2.7			2.63	1.37
	HSC-2		4.78	5.14	0.73			2.11	2.94
	HSC-2		3.79	3.6	2.62			4.1	1.81
	HSC-2		3.15	4.72	3.3			1.87	1.89
	HSC-2		1.89	1.94	2.25			1.3	1.64
	HSC-2		3.41	4.02	3.08			2.36	2.51
	HSC-2		0.95	6.62				2.57	1.65
	HSC-2		1.97	2.39				3.91	2.2
	HSC-2			3.38				3.28
	HSC-2			1.94				3
	HSC-2			2.28				3.56
	HSC-2			4.49				4.69
	HSC-2			2.54				2.87
	HSC-2			2.69				3.48
	HSC-2			4.24				2.26
	HSC-2			2.84				3.28
	HSC-2			3.41				1.76
	HSC-2			6.57				1.99
	HSC-2			3.27				1.79
	HSC-2			3.81				1.61
	HSC-2			1.86				1.11
	HSC-2			3.3				2.74
	HSC-2			2.95				3.34
	HSC-2			1.48				3.57
	HSC-2			1.66				3.53
	HSC-2			2.29				2.45
	HSC-2			4.17				3.16
	HSC-2			1.04				0.86
	HSC-2			3.58				3.67
	HSC-2			2.91				2.23
	HSC-2			0.94				4.84
	HSC-2			4.49				2.85
	HSC-2			3.88				1.85
	HSC-2			2.87				2.69
	HSC-2			1.26				1.4
	HSC-2			3.73				2.44
	HSC-2			2.82				3.98
	HSC-2			4.63				4.09
	HSC-2			3.07				3.44
	HSC-2			2.66				3.81
	HSC-2			1.53				1.5
	HSC-2			4.3				3.36
	HSC-2			3.15				2.32
	HSC-2			3.36				2.28
	HSC-2			2.48				2.78
	HSC-2			3.83				2.88
	HSC-2			2.61				3.33
	HSC-2			2.03				2.32
	HSC-2			3.01				1.2
	HSC-2			2.54				2.59
	HSC-2			2.47				2.48
	HSC-2			2.97				2.22
	HSC-2			1.84				2
	HSC-2			2.23				3.03
	HSC-2			1.63
	HSC-2			2.01
	HSC-2			4.05
	HSC-2			2.01
	HSC-2			2.95
	HSC-2			2.55
	HSC-2			3.45
	HSC-2			3.13
	HSC-2			3.06
	HSC-2			2.91
	HSC-2			3.34
	HSC-2			1.57
	HSC-2			3.85
	HSC-2			2.26
	HSC-2			3.18
	HSC-2			2.58
	HSC-2			2.6
	HSC-2			3.49
	HSC-2			3.98
	HSC-2			1.64
	HSC-3	2.57	3.01	2.5	2.1	2.96	2.17	2.25	3.12
	HSC-3	3.28	1.01	2.31	2.29	1.78	3.45	3.41	2.71
	HSC-3	1.67	1.94	2.24	1.52	4.34	2.52	1.88	4.03
	HSC-3	4.75	1.4	3.39	1.39		1.12	4.8	1.75
	HSC-3	1.21	2.52	2.08	1.94		1.83	1.04	3.83
	HSC-3	2.34	2.22	2.89	1.92		3.06	1.83	3.18
	HSC-3	2.68	1.28	2.1	1.03		2.02	1.6	2.91
	HSC-3	2.03	0.95	1.07	4.5		1.43	0.95	2.89
	HSC-3	2.68	2.73	2.7	1.29		0.88	3.41	3.5
	HSC-3		1.27	0.87	3.06		0.91	1.89	1.59
	HSC-3		0.88	2.04	4.36		2.32	2.6	4.81
	HSC-3		1.07	1.61	2.3		0.91	2.68	5.15
	HSC-3		1.66	3.79	2.55		1.26	1.3	1.65
	HSC-3		2.63	2.29	1.48		3.36	0.95	3.49
	HSC-3		1.3	0.98	2.43		1.53	4.12	4.47
	HSC-3		1.99	1.1	2.52		1.32	0.84	2.18
	HSC-3		1.02	0.91	3.02		2.45	2.52	2.25
	HSC-3		1.45	2.07	3.21		3.19	3.71	1.94
	HSC-3		1.31	4.11	2.43		1.11	3.2	5.16
	HSC-3		1.38	0.89	2.69		3.08	4.22	3.21
	HSC-3		2.57	1.89	3.54		4.27	1.99	1.67
	HSC-3		3.06	1.72	3.05			2.36	1.42
	HSC-3		1.3	3.45	0.83			4.32	2.29
	HSC-3		2.85	3.74	1.72			0.97	1.18
	HSC-3		3.9	2.34	7.04			1.25	3.94
	HSC-3		3.31	3.49	3.22			1.7	1.78
	HSC-3		1.34	1.37	4.28			2.94	2.63
	HSC-3		1.79	1.37	1.57			3.41	1.78
	HSC-3		2.13	1.53	1.45			3.65	3.29
	HSC-3		2.04	3.76	4.94			3.37	1.04
	HSC-3		2.37	4.24	4.72			4.13	3.36
	HSC-3		3.3	2.47	2.75			1.58	0.94
	HSC-3			2.84	2.12			3.92	1.25
	HSC-3			2.03	1.56			2.48
	HSC-3			0.94	3.46			0.92
	HSC-3			6.12	3.69			3.6
	HSC-3			3.44	6.14
	HSC-3			2.9	1.39
	HSC-3			1.24	2.69
	HSC-3			2.35	2.98
	HSC-3			2.67	1.28
	HSC-3			1.91	3.73
	HSC-3			3.08	4.65
	HSC-3			5.83	4.95
	HSC-3			2.51	3.08
	HSC-3			3.93	1.57
	HSC-3			4.71	4.52
	HSC-3			1.14	4.26
	HSC-3			6.52	1.31
	HSC-3			2.29	3.09
	HSC-3			2.16	4.01
	HSC-3			3.26
	HSC-3			1.75
	HSC-3			1.38
	HSC-3			1.68
	HSC-3			0.82
	HSC-3			2.04
	HSC-3			2.77
	HSC-3			2.29
	HSC-3			1.61
	HSC-3			4.1
	HSC-3			3.23
	HSC-3			2.56
	HSC-3			4.69
	HSC-3			3.39
	HSC-3			1.62
	HSC-3			2.59
	HSC-3			2.16
	HSC-3			2.46
	HSC-3			1.94
	HSC-3			3.15
	HSC-3			2.85
	HSC-3			2.87

## Sheet: Figure 5 & Figure 6 (raw)
Title:	Cell count for percentage of ciliated HSC-2 and HSC-3 cells cultured in the media with or without serum. A total of 200 cells were counted for each biological repeat (Total 3 biological repeats for each cell lines)
		Low serum media (2% serum concentration)																					High serum media (20% serum concentration)
		24 h							48 h							72 h							24 h							48 h							72 h
		with serum			without serum				with serum			without serum				with serum			without serum				with serum			without serum				with serum			without serum				with serum			without serum
		Nucleus	Nucleus with primary cilia	%	Nucleus	Nucleus with primary cilia	%		Nucleus	Nucleus with primary cilia	%	Nucleus	Nucleus with primary cilia	%		Nucleus	Nucleus with primary cilia	%	Nucleus	Nucleus with primary cilia	%		Nucleus	Nucleus with primary cilia	%	Nucleus	Nucleus with primary cilia	%		Nucleus	Nucleus with primary cilia	%	Nucleus	Nucleus with primary cilia	%		Nucleus	Nucleus with primary cilia	%	Nucleus	Nucleus with primary cilia	%
HSC-2 (Repeat 1)		23	0		33	0			25	0		25	3			14	0		39	4			37	0		31	1			41	1		21	3			50	2		34	3
		32	0		2	0			22	1		35	5			24	0		24	8			50	1		30	1			41	1		23	1			40	1		12	2
		30	0		33	1			18	0		38	2			20	3		29	8			15	2		46	1			46	0		22	1			38	1		33	1
		24	0		29	0			26	0		31	5			28	0		23	11			52	0		36	1			40	1		23	0			24	1		19	3
		13	0		30	2			31	0		34	3			22	0		34	8			46	2		28	0			32	0		28	1			48	2		37	3
		22	0		31	0			27	1		37	3			20	0		24	5						29	1						19	1						65	6
		24	0		21	2			26	0						16	0		27	5													27	1
		32	0		21	1			25	0						14	2																29	1
																21	1																8	2
																21	0
	Total cells:	200	0	0	200	6	3		200	2	1	200	21	10.5		200	6	3	200	49	24.5		200	5	2.5	200	5	2.5		200	3	1.5	200	11	5.5		200	7	3.5	200	18	9
HSC-2 (Repeat 2)		31	0		25	1			26	0		23	4			23	0		39	3			37	1		38	2			29	0		47	3			36	1		22	0
		28	0		30	2			35	0		33	1			30	1		40	7			29	2		34	1			49	0		29	5			35	2		15	0
		26	1		23	1			26	1		22	6			25	0		42	5			38	2		32	1			29	0		39	1			52	0		18	3
		32	1		30	1			27	0		32	1			27	1		35	4			41	0		34	1			24	0		40	5			39	3		29	3
		25	0		26	2			23	0		31	2			33	0		44	9			14	0		46	1			28	0		45	1			38	0		21	4
		28	0		11	0			20	0		32	3			3	0						41	1		16	1			41	0									28	4
		30	1		28	1			14	1		26	5			27	0																							36	7
					27	3			15	0		1	0			32	1																							31	5
									14	0
	Total cells:	200	3	1.5	200	11	5.5		200	2	1	200	22	11		200	3	1.5	200	28	14		200	6	3	200	7	3.5		200	0	0	200	15	7.5		200	6	3	200	26	13
HSC-2 (Repeat 3)		26	0		33	1			27	0		30	3			38	0		38	9			27	0		20	0			25	0		21	4
		13	0		26	1			22	1		31	1			34	1		42	6			35	0		40	2			26	0		40	1			53	0		63	6
		33	0		31	2			24	0		33	3			35	0		36	7			28	0		26	0			31	0		47	2			49	0		39	4
		38	1		37	0			19	0		20	1			10	0		48	6			39	1		27	1			44	0		38	2			41	0		40	4
		28	0		23	0			21	0		21	2			48	1		36	7			32	0		32	1			31	0		14	1			57	3		41	4
		30	0		37	2			22	0		35	5			35	0						39	0		33	1			40	0		40	2						17	3
		32	0		13	0			23	0		27	1													22	2			3	0
									18	0		3	0
									24	0
	Total cells:	200	1	0.5	200	6	3		200	1	0.5	200	16	8		200	2	1	200	35	17.5		200	1	0.5	200	7	3.5		200	0	0	200	12	6		200	3	1.5	200	21	10.5
HSC-3 (Repeat 1)		24	0		19	0			42	0		30	1			64	0		39	5			28	0		28	0			33	0		23	1			56			4	0
		25	0		18	0			58	0		25	3			65	0		38	8			20	0		12	0			43	0		22	2			66			21	2
		23	0		26	1			74	1		26	1			71	0		18	2			2	0		32	0			39	0		2	0			51			18	2
		29	0		20	0			26	0		0	1						37	4			29	0		31	1			38	0		21	1			27			33	2
		9	0		21	0						21	2						29	2			32	0		26	0			47	0		37	3						33	2
		34	0		14	0						25	1						39	1			26	0		20	0						33	1						35	3
		26	0		23	0						15	1										31	0		22	1						25	2						23	2
		30	0		36	2						21	2										32	0		29	0						37	1						33	6
					23	1						15	1
												4	0
												18	2
	Total cells:	200	0	0	200	4	2		200	1	0.5	200	15	7.5		200	0	0	200	22	11		200	0	0	200	2	1		200	0	0	200	11	5.5		200	0	0	200	19	9.5
HSC-3 (Repeat 2)		26	0		32	2			31	0		35	3			61	0		23	1			29	0		41	0			41	0		16	1			77			18	3
		32	0		33	0			40	0		19	2			73	0		29	2			19	0		34	0			40	0		26	1			75			28	3
		33	0		30	1			46	0		22	2			66	0		20	2			28	0		0	0			48	0		17	2			48			40	7
		14	0		33	0			37	0		22	0						33	4			32	1		40	1			37	0		27	1						25	2
		33	0		37	1			46	0		22	1						39	6			23	0		34	1			34	0		39	2						30	4
		29	0		35	1						32	0						34	2			37	0		51	1						24	2						24	2
		33	0									18	1						22	3			32	0									21	2						35	2
												29	1																				30	3
												1	0
	Total cells:	200	0	0	200	5	2.5		200	0	0	200	10	5		200	0	0	200	20	10		200	1	0.5	200	3	1.5		200	0	0	200	14	7		200	0	0	200	23	11.5
HSC-3 (Repeat 3)		26	0		26	0			49	0		40	2			57	1		26	2			31	0		19	0			35	0		27	1			70			66	6
		8	0		23	1			42	0		30	2			63	0		29	3			27	0		2	0			36	0		29	1			68			20	2
		21	0		13	0			53	0		31	3			60	0		6	1			32	0		31	0			54	0		33	3			62			57	4
		21	0		34	0			32	0		10	1			20	0		29	3			31	0		25	1			42	0		54	2						57	2
		27	0		35	1			24	0		31	1						56	5			37	0		19	0			33	0		57	2
		23	0		33	0						26	1						54	6			42	0		26	1
		25	0		36	1						32	2													18	0
		18	0																							21	0
		31	0																							39	0
	Total cells:	200	0	0	200	3	1.5		200	0	0	200	12	6		200	1	0.5	200	20	10		200	0	0	200	2	1		200	0	0	200	9	4.5		200	0	0	200	14	7

## Sheet: Figure 5 & Figure 6 (%)
Title:	Percentage of ciliated HSC-2 and HSC-3 cells cultured in the media with or without serum
		Low serum media (2% serum concentration)						High serum media (20% serum concentration)
	Groups	24 h		48 h		72 h		24 h		48 h		72 h
		with serum	without serum	with serum	without serum	with serum	without serum	with serum	without serum	with serum	without serum	with serum	without serum
	HSC-2 (Repeat 1)	0	3	1	10.5	3	24.5	2.5	2.5	1.5	5.5	3.5	9
	HSC-2 (Repeat 2)	1.5	5.5	1	11	1.5	14	3	3.5	0	7.5	3	13
	HSC-2 (Repeat 3)	0.5	3	0.5	8	1	17.5	0.5	3.5	0	6	1.5	10.5
	HSC-3 (Repeat 1)	0	2	0.5	7.5	0	11	0	1	0	5.5	0	9.5
	HSC-3 (Repeat 2)	0	2.5	0	5	0	10	0.5	1.5	0	7	0	11.5
	HSC-3 (Repeat 3)	0	1.5	0	6	0.5	10	0	1	0	4.5	0	7

## Sheet: Figure 7
	CT value (GAPDH)				GAPDH CT value average				CT Value (IFT20)				ΔΔCT (IFT20 CT-GAPDH CT Average)					2% 48 h			20% 48 h			2% 72 h			20% 72 h					PCR IFT20 fold change results
Groups	2% 48 h	20% 48 h	2% 72 h	20% 72 h	2% 48 h	20% 48 h	2% 72 h	20% 72 h	2% 48 h	20% 48 h	2% 72 h	20% 72 h	2% 48 h	20% 48 h	2% 72 h	20% 72 h		2^-ΔΔCT	av 2^-ΔΔCT	relative expression	2^-ΔΔCT	av 2^-ΔΔCT	relative expression	2^-ΔΔCT	av 2^-ΔΔCT	relative expression	2^-ΔΔCT	av 2^-ΔΔCT	relative expression						relative expression			relative expression			relative expression
OKF6_TERT2	16.8722	16.0004	14.9152	15.9875	16.6214	15.8179	15.9232	16.4882	23.9888	23.4796	22.3745	22.947	-7.36733	-7.66167	-6.45132	-6.45884	OKF6_TERT2	0.0068405	0.00588143	1	0.00479096	0.00468105	1	0.0112176	0.00657165	1	0.0111384	0.0112106	1			0.02	48 h	OKF6_TERT2	1		HSC-2	1.53391		HSC-3	0.991749
OKF6_TERT2	16.6558	15.9905	14.8904	16.1861					23.6568	23.5793	22.4009	22.9495	-7.03533	-7.76143	-6.47765	-6.46126	OKF6_TERT2	0.00669004		1	0.00449873		1	0.00421402		1	0.012077		1				72 h	OKF6_TERT2	1		HSC-2	2.00631		HSC-3	1.80553
OKF6_TERT2	16.7561	15.8252	14.8783	16.1384					23.8129	23.513	22.429	23.0348	-7.19145	-7.69508	-6.50582	-6.54657	OKF6_TERT2	0.00411376		1	0.00475347		1	0.00428333		1	0.0104165		1
OKF6_TERT2	16.3988	15.7195	16.2069	16.5315					23.3631	23.6136	24.1608	22.8306	-6.74164	-7.7957	-8.2376	-6.34241
OKF6_TERT2	16.3489	15.8276	16.1539	16.5427					25.5317	23.6785	23.67	22.8953	-8.91029	-7.86058	-7.74676	-6.40715																0.2	48 h	OKF6_TERT2	1		HSC-2	1.14882		HSC-3	1.14066
OKF6_TERT2	16.2616	15.7097	16.0623	16.7586					23.475	23.5531	23.6646	22.8542	-6.85358	-7.73524	-7.74138	-6.36597																	72 h	OKF6_TERT2	1		HSC-2	1.43806		HSC-3	1.08273
OKF6_TERT2	16.9666	15.6478	16.1354	16.6296					24.6273	23.6484	23.7601	24.105	-8.00586	-7.83052	-7.83692	-7.61683
OKF6_TERT2	16.5798	15.8061	16.3642	16.7033					24.487	23.8222	23.7293	23.0439	-7.86558	-8.00425	-7.80614	-6.55566
OKF6_TERT2	16.5957	15.7944	16.5287	16.7006					24.5295	23.2054	23.886	22.4975	-7.9081	-7.38746	-7.96282	-6.00929
HSC-2	16.8334	15.9136	15.8645	16.168	16.7721	16.0628	16.9347	17.1595	23.645	23.5085	22.7692	23.3673	-6.87287	-7.44566	-5.83449	-6.20779	HSC2	0.00833466	0.00902157	1.41711	0.00541571	0.0053777	1.15694	0.0175078	0.0131848	2.66414	0.0129544	0.0161216	1.15555
HSC-2	16.9696	15.9532	15.8102	16.1549					23.5696	23.4484	22.6661	23.4552	-6.7975	-7.38555	-5.73138	-6.29569	HSC2	0.00957647		1.62826	0.00499368		1.06679	0.00709957		1.08033	0.0111792		0.997198
HSC-2	16.8011	15.9709	15.8144	15.997					23.8344	23.8489	22.8846	23.4694	-7.06235	-7.78613	-5.94998	-6.30989	HSC2	0.00915357		1.55635	0.00572372		1.22274	0.014947		2.27446	0.0242312		2.16145
HSC-2	16.5564	16.0345	17.6401	17.5947					23.3139	23.6615	24.2947	23.7835	-6.54177	-7.59867	-7.35998	-6.62407
HSC-2	16.5315	16.2031	17.6937	17.6229					23.5428	23.6699	23.9634	23.3159	-6.77072	-7.60706	-7.02872	-6.15643
HSC-2	16.3434	16.2058	17.4637	17.6828					23.5942	23.7982	23.9834	23.8956	-6.82207	-7.73534	-7.04875	-6.73617
HSC-2	16.9448	15.995	16.7322	17.4199					23.6529	23.5811	22.9704	22.651	-6.88083	-7.51823	-6.03568	-5.49156
HSC-2	16.7528	16.2068	16.9174	17.2352					23.526	23.4589	22.856	22.4016	-6.75395	-7.39609	-5.92136	-5.24211
HSC-2	17.0651	16.0444	16.9085	17.3383					23.4584	23.4977	23.1893	22.5376	-6.68628	-7.43485	-6.25459	-5.37814
HSC-3	16.4234	16.1113	16.0978	15.3699	16.3339	16.1919	16.5771	16.4389	23.3764	23.5212	22.3258	23.1583	-7.04257	-7.32932	-5.74874	-6.71944	HSC3	0.00626376	0.0058329	1.06501	0.00522873	0.0053395	1.117	0.01683	0.0118653	2.561	0.00939808	0.0121381	0.838318
HSC-3	16.1939	16.2547	16.2108	15.3289					23.7229	23.9539	22.5224	23.2018	-7.38899	-7.76196	-5.94538	-6.76288	HSC3	0.00464231		0.789316	0.00525526		1.12267	0.0073242		1.11451	0.0129707		1.157
HSC-3	16.4142	16.3411	16.4816	15.1953					23.9101	23.8764	22.5734	23.1573	-7.57626	-7.68448	-5.99636	-6.71839	HSC3	0.00659264		1.12092	0.0055345		1.18232	0.0114417		1.74107	0.0140455		1.25287
HSC-3	16.5152	15.9663	16.8216	16.6828					23.9745	23.62	23.7011	22.6495	-7.64066	-7.4281	-7.12399	-6.21056
HSC-3	16.382	15.9522	16.6935	16.8574					24.0807	23.7238	23.6555	22.7673	-7.74681	-7.53185	-7.0784	-6.32841
HSC-3	16.5089	15.9257	16.5259	17.0952					24.2087	23.9701	23.6545	22.7081	-7.87486	-7.77814	-7.07744	-6.26923
HSC-3	16.0695	16.3261	16.7122	16.6169					23.6007	23.6187	23.1296	22.3745	-7.26678	-7.42681	-6.55249	-5.93559
HSC-3	16.1049	16.4899	16.6494	16.6636					23.6477	23.7346	22.9604	22.5903	-7.31387	-7.54273	-6.38332	-6.15143
HSC-3	16.3175	16.249	16.8248	16.7506					23.4924	23.7171	22.9954	22.8526	-7.15856	-7.52518	-6.41832	-6.41366

## Sheet: Figure 8
IFT20												siRNA IFT20 fold change results							MMP9												MMP 9 fold change results
Groups	CT value GAPDH (correspond to IFT20)	GAPDH CT value average (correspond to IFT20)	CT valur IFT20	ΔΔCT			2^-ΔΔCT	av 2^-ΔΔCT	relative expression					relative expression					Groups	CT value GAPDH (correspond to IFT20)	GAPDH CT value average (correspond to IFT20)	CT valur IFT20	ΔΔCT			2^-ΔΔCT	av 2^-ΔΔCT	relative expression					relative expression
HSC-2 mock	15.9102	16.2032	23.7759	-7.57266		HSC-2 mock	0.00456546	0.00643799	1				HSC-2 mock	1					HSC-2 mock	16.1374	15.6112	27.9012	-12.29		HSC-2 mock	0.000193474	0.000132833	1				HSC-2 mock	1
HSC-2 mock	16.3124		24.0532	-7.84998		HSC-2 mock	0.00389866		1				sirna ift20	0.412401					HSC-2 mock	16.0992		27.9778	-12.3666		HSC-2 mock	0.000178093		1				sirna ift20	2.48769
HSC-2 mock	16.4172		24.1302	-7.92695		HSC-2 mock	0.0108498		1										HSC-2 mock	16.0601		27.9625	-12.3513		HSC-2 mock	2.69332e-05		1
HSC-2 mock	16.9773		24.1163	-7.91313									HSC-3 mock	1					HSC-2 mock	15.8712		27.7812	-12.1699									HSC3 mock	1
HSC-2 mock	16.9919		24.2062	-8.003									sirna ift20	0.0488405					HSC-2 mock	15.7403		28.1037	-12.4924									sirna ift20	0.9538
HSC-2 mock	16.9612		24.3014	-8.09821															HSC-2 mock	15.9568		28.3756	-12.7644
HSC-2 mock	14.4246		22.4416	-6.2384															HSC-2 mock	14.4246		30.8977	-15.2865
HSC-2 mock	14.3037		22.9888	-6.7856															HSC-2 mock	14.3037		30.5579	-14.9467
HSC-2 mock	14.2431		22.8128	-6.60961															HSC-2 mock	14.2431		30.9511	-15.3399
HSC-2 sirna ift20	15.9626	16.8684	27.5385	-10.6701		HSC-2 sirna ift20	0.000513585	0.00265503	0.0797741										HSC-2 sirna ift20	17.5894	16.9774	29.8966	-12.9192		HSC2 siRNA	0.000129727	0.000330449	0.976614
HSC-2 sirna ift20	15.9668		27.9822	-11.1137		HSC-2 sirna ift20	0.000631651		0.0981131										HSC-2 sirna ift20	17.6573		29.851	-12.8736		HSC2 siRNA	0.000127226		0.957787
HSC-2 sirna ift20	15.9125		27.9059	-11.0375		HSC-2 sirna ift20	0.00681987		1.05932										HSC-2 sirna ift20	17.5591		29.9223	-12.9449		HSC2 siRNA	0.000734393		5.52868
HSC-2 sirna ift20	18.2257		27.3912	-10.5228															HSC-2 sirna ift20	17.4372		29.9031	-12.9257
HSC-2 sirna ift20	18.1122		27.2772	-10.4088															HSC-2 sirna ift20	17.343		29.905	-12.9276
HSC-2 sirna ift20	17.9407		27.8942	-11.0257															HSC-2 sirna ift20	17.4153		29.9455	-12.968
HSC-2 sirna ift20	13.7626		23.9604	-7.09199															HSC-2 sirna ift20	13.7626		27.6899	-10.7125
HSC-2 sirna ift20	13.6546		24.0509	-7.18245															HSC-2 sirna ift20	13.6546		27.3056	-10.3282
HSC-2 sirna ift20	14.2113		24.1914	-7.32302															HSC-2 sirna ift20	14.2113		27.2132	-10.2357
HSC-3 mock	15.0755	16.2432	22.0301	-5.78689		HSC-3 mock	0.016797	0.0137368	1										HSC-3 mock	16.8282	16.5942	30.8977	-14.3036		HSC-3 mock	5.32338e-05	0.000122944	1
HSC-3 mock	15.9411		22.6328	-6.38962		HSC-3 mock	0.0195021		1										HSC-3 mock	16.9111		30.5579	-13.9637		HSC-3 mock	0.000153706		1
HSC-3 mock	16.1791		21.8619	-5.61871		HSC-3 mock	0.00491138		1										HSC-3 mock	16.9236		30.9511	-14.3569		HSC-3 mock	0.000161893		1
HSC-3 mock	15.5865		21.798	-5.55473															HSC-3 mock	15.5865		29.4229	-12.8287
HSC-3 mock	15.7913		21.7949	-5.55164															HSC-3 mock	15.7913		29.2074	-12.6132
HSC-3 mock	15.3714		22.217	-5.97376															HSC-3 mock	15.3714		29.1678	-12.5736
HSC-3 mock	16.9726		23.7411	-7.49784															HSC-3 mock	16.9726		29.0982	-12.504
HSC-3 mock	16.9166		23.9661	-7.72288															HSC-3 mock	16.9166		29.3018	-12.7076
HSC-3 mock	16.9417		24.0493	-7.80611		HSC-3 sirna ift20	0.000268841	0.000670913	0.0195708										HSC-3 mock	16.9417		29.1679	-12.5737		HSC3 siRNA	7.11835e-05	0.000117268	0.578989
HSC-3 sirna ift20	17.4216	16.8645	28.9681	-12.1035		HSC-3 sirna ift20	0.000369665		0.0269105										HSC-3 sirna ift20	17.3985	16.8472	30.9626	-14.1153		HSC3 siRNA	0.000140083		1.19456
HSC-3 sirna ift20	17.3564		28.6153	-11.7507		HSC-3 sirna ift20	0.00137423		0.10004										HSC-3 sirna ift20	17.1963		30.7788	-13.9316		HSC3 siRNA	0.000140536		1.19842
HSC-3 sirna ift20	17.2943		28.6207	-11.7561															HSC-3 sirna ift20	17.3609		30.2365	-13.3892
HSC-3 sirna ift20	15.8746		28.9755	-12.111															HSC-3 sirna ift20	15.8746		29.9732	-13.1259
HSC-3 sirna ift20	15.9194		28.1084	-11.2439															HSC-3 sirna ift20	15.9194		29.7245	-12.8773
HSC-3 sirna ift20	15.9533		27.9177	-11.0532															HSC-3 sirna ift20	15.9533		29.3237	-12.4764
HSC-3 sirna ift20	16.9859		26.2701	-9.40558															HSC-3 sirna ift20	16.9859		29.6682	-12.821
HSC-3 sirna ift20	16.9121		26.3673	-9.5028															HSC-3 sirna ift20	16.9121		29.6674	-12.8202
HSC-3 sirna ift20	17.0015		26.4857	-9.62113															HSC-3 sirna ift20	17.0015		29.5975	-12.7503
